# Supplementary material for: Sleep laboratories reopening and COVID-19: a European perspective
Source: PubMed Central journal article supplement — Eur Respir J. 2021 Mar 4;57(3):2002722. doi: 10.1183/13993003.02722-2020 (PMC7683791; doi:10.1183/13993003.02722-2020), 2021-03-04
Supplement: ERJ-02722-2020.Table_E2.pdf [file ERJ-02722-2020.Table_E2.pdf]

**Table E2. Diagnosing patients at the Sleep Lab during COVID-19 pandemic**

| Spain (5)                                                                                                                                                                                                                                                                                                                                                              | UK (8)                                                                                                                                                                                                                                                                                                                      | Germany (7)                                                                                                                                                                                                                                                                                                | Italy (6)                                                                                                                                                                                                                                                                                                                     | USA (AASM, APCCSDD-ATS) (2, 3)                                                                                                                                                                                                                                                                                                                                           | Canada (4)                                                                                                                                                                                                                                                                                                        |
|------------------------------------------------------------------------------------------------------------------------------------------------------------------------------------------------------------------------------------------------------------------------------------------------------------------------------------------------------------------------|-----------------------------------------------------------------------------------------------------------------------------------------------------------------------------------------------------------------------------------------------------------------------------------------------------------------------------|------------------------------------------------------------------------------------------------------------------------------------------------------------------------------------------------------------------------------------------------------------------------------------------------------------|-------------------------------------------------------------------------------------------------------------------------------------------------------------------------------------------------------------------------------------------------------------------------------------------------------------------------------|--------------------------------------------------------------------------------------------------------------------------------------------------------------------------------------------------------------------------------------------------------------------------------------------------------------------------------------------------------------------------|-------------------------------------------------------------------------------------------------------------------------------------------------------------------------------------------------------------------------------------------------------------------------------------------------------------------|
| <b>In-laboratory PSG</b>                                                                                                                                                                                                                                                                                                                                               |                                                                                                                                                                                                                                                                                                                             |                                                                                                                                                                                                                                                                                                            |                                                                                                                                                                                                                                                                                                                               |                                                                                                                                                                                                                                                                                                                                                                          |                                                                                                                                                                                                                                                                                                                   |
| <ul style="list-style-type: none"> <li>Limited to urgent and high risk patients. <ul style="list-style-type: none"> <li>➤ Prefer younger patients (age&lt;65), without comorbidities.</li> <li>➤ +/-Negative PCR 48h before the test</li> </ul> </li> <li>In case of low community spread of COVID-19 fewer restrictions (regarding age and comorbidities).</li> </ul> | <ul style="list-style-type: none"> <li>Limited to urgent and high risk patients in the absence of other diagnostic method.</li> <li>Negative PCR before 48 hr before test and/or home isolation 14 days.</li> </ul>                                                                                                         | <ul style="list-style-type: none"> <li>Preferred to home sleep testing.</li> </ul>                                                                                                                                                                                                                         | <ul style="list-style-type: none"> <li>Initially postponed. Now, only limited to patients with suspected concomitant sleep-disorders.</li> </ul>                                                                                                                                                                              | <ul style="list-style-type: none"> <li>Limited to urgent and high risk patients <ul style="list-style-type: none"> <li>➤ Prefer younger patients (age 18-65yrs), without comorbidities.</li> <li>➤ +/-Negative PCR 48h before the test</li> </ul> </li> <li>In case of low community spread of COVID-19 fewer restrictions (regarding age and comorbidities).</li> </ul> | <ul style="list-style-type: none"> <li>Limited to urgent/semiurgent patients (as per locally applicable criteria)</li> </ul>                                                                                                                                                                                      |
| <b>Home sleep testing</b>                                                                                                                                                                                                                                                                                                                                              |                                                                                                                                                                                                                                                                                                                             |                                                                                                                                                                                                                                                                                                            |                                                                                                                                                                                                                                                                                                                               |                                                                                                                                                                                                                                                                                                                                                                          |                                                                                                                                                                                                                                                                                                                   |
| <ul style="list-style-type: none"> <li>Preferred method.</li> <li>Cardiorespiratory polygraphy.</li> <li>Disposable equipment recommended if available.</li> <li>Equipment disinfected, according to the manufacturer's instructions.</li> </ul>                                                                                                                       | <ul style="list-style-type: none"> <li>Preferred method.</li> <li>Cardiorespiratory polygraphy and limited sleep test methodology or oximetryif high pre test probability.</li> <li>Disposable equipment recommended if available.</li> <li>Equipment disinfected, according to the manufacturer's instructions.</li> </ul> | <ul style="list-style-type: none"> <li>Not preferred.</li> <li>Disposable equipment is recommended if available.</li> <li>Equipment disinfected according to the manufacturer's instructions.</li> </ul>                                                                                                   | <ul style="list-style-type: none"> <li>Preferred method</li> <li>PSG/polygraphy and limited sleep test methodology.</li> <li>The use of nasal cannulas is not recommended.</li> <li>Disposable equipment is recommended if available</li> <li>Equipment disinfected, according to the manufacturer's instructions.</li> </ul> | <ul style="list-style-type: none"> <li>Preferred method.</li> <li>Additional option of using of pickup/return instead of a delivery service model.</li> <li>Disposable equipment recommended if available.</li> <li>Equipment disinfected according to the manufacturer's instructions (in addition remove from service at least 72 hours before re-use).</li> </ul>     | <ul style="list-style-type: none"> <li>Preferred method.</li> <li>Level 3/4 studies.</li> <li>Disposable equipment recommended if available.</li> <li>Equipment disinfected, according to the manufacturer's instructions.</li> </ul>                                                                             |
| <b>Screening for COVID-19</b>                                                                                                                                                                                                                                                                                                                                          |                                                                                                                                                                                                                                                                                                                             |                                                                                                                                                                                                                                                                                                            |                                                                                                                                                                                                                                                                                                                               |                                                                                                                                                                                                                                                                                                                                                                          |                                                                                                                                                                                                                                                                                                                   |
| <ul style="list-style-type: none"> <li>Before study (symptoms, contact history) and/or swab.</li> <li>Check again at time of the study for temperature, COVID-19 symptoms and +/-negative PCR.</li> <li>Cleaning precautions for the physical space and equipment, according to local recommendations.</li> </ul>                                                      | <ul style="list-style-type: none"> <li>Before study (questionnaire).</li> <li>Check again at time of the study for temperature, COVID-19 symptoms+/-negative PCR.</li> <li>Cleaning precautions for the physical space and equipment according to local recommendations.</li> </ul>                                         | <ul style="list-style-type: none"> <li>Before study (questionnaire).</li> <li>Test before access to hospital.</li> <li>Check again at time of the study for temperature, COVID-19 symptoms (not tests in general).</li> <li>Cleaning precautions for the physical space and equipment according</li> </ul> | <ul style="list-style-type: none"> <li>Before study (symptoms, contact history) and/or swab.</li> <li>Avoid any evaluation in children, pregnant women, elderly and in patients with comorbidities.</li> <li>Cleaning precautions for the physical space and equipment, according to local recommendations.</li> </ul>        | <ul style="list-style-type: none"> <li>Before study (symptoms, contact history) and/or swab.</li> <li>Check again at time of the study for temperature, COVID-19 symptoms and +/-negative PCR.</li> <li>Cleaning precautions for the physical space and equipment, according to local recommendations.</li> </ul>                                                        | <ul style="list-style-type: none"> <li>Before study (symptoms, contact history) and/or swab.</li> <li>Check again at time of the study for temperature, COVID-19 symptoms and +/-negative PCR.</li> <li>Cleaning precautions for the physical space and equipment, according to local recommendations.</li> </ul> |

|                                                                                                                                                                                                                                                                                                                                                                                                                                                                                                                                                                                                                                                                                                                                                                                                                                                                                                                                                                                                                                                                                                                                                                                                                                                                                                                                                                                                                                                                                                                                                                                                                                                                                                                                                                                                                                      |                                                                                                                                          |                                                                                                                                          |                                                                                                                                          |                                                                                                                                          |                                                                                                                                          |
|--------------------------------------------------------------------------------------------------------------------------------------------------------------------------------------------------------------------------------------------------------------------------------------------------------------------------------------------------------------------------------------------------------------------------------------------------------------------------------------------------------------------------------------------------------------------------------------------------------------------------------------------------------------------------------------------------------------------------------------------------------------------------------------------------------------------------------------------------------------------------------------------------------------------------------------------------------------------------------------------------------------------------------------------------------------------------------------------------------------------------------------------------------------------------------------------------------------------------------------------------------------------------------------------------------------------------------------------------------------------------------------------------------------------------------------------------------------------------------------------------------------------------------------------------------------------------------------------------------------------------------------------------------------------------------------------------------------------------------------------------------------------------------------------------------------------------------------|------------------------------------------------------------------------------------------------------------------------------------------|------------------------------------------------------------------------------------------------------------------------------------------|------------------------------------------------------------------------------------------------------------------------------------------|------------------------------------------------------------------------------------------------------------------------------------------|------------------------------------------------------------------------------------------------------------------------------------------|
|                                                                                                                                                                                                                                                                                                                                                                                                                                                                                                                                                                                                                                                                                                                                                                                                                                                                                                                                                                                                                                                                                                                                                                                                                                                                                                                                                                                                                                                                                                                                                                                                                                                                                                                                                                                                                                      |                                                                                                                                          | to local recommendations.                                                                                                                |                                                                                                                                          |                                                                                                                                          |                                                                                                                                          |
| <b>Healthcare professional safety</b>                                                                                                                                                                                                                                                                                                                                                                                                                                                                                                                                                                                                                                                                                                                                                                                                                                                                                                                                                                                                                                                                                                                                                                                                                                                                                                                                                                                                                                                                                                                                                                                                                                                                                                                                                                                                |                                                                                                                                          |                                                                                                                                          |                                                                                                                                          |                                                                                                                                          |                                                                                                                                          |
| <ul style="list-style-type: none"> <li>General protective measures for health professionals according to national guidelines.</li> </ul>                                                                                                                                                                                                                                                                                                                                                                                                                                                                                                                                                                                                                                                                                                                                                                                                                                                                                                                                                                                                                                                                                                                                                                                                                                                                                                                                                                                                                                                                                                                                                                                                                                                                                             | <ul style="list-style-type: none"> <li>General protective measures for health professionals according to national guidelines.</li> </ul> | <ul style="list-style-type: none"> <li>General protective measures for health professionals according to national guidelines.</li> </ul> | <ul style="list-style-type: none"> <li>General protective measures for health professionals according to national guidelines.</li> </ul> | <ul style="list-style-type: none"> <li>General protective measures for health professionals according to national guidelines.</li> </ul> | <ul style="list-style-type: none"> <li>General protective measures for health professionals according to national guidelines.</li> </ul> |
| <p><b>Similarities</b></p> <ul style="list-style-type: none"> <li>All patients are assessed prior to their in-person appointment by phone for COVID-19 (symptoms, contact history, or questionnaire).</li> <li>Patients are again checked at time of the appointment for temperature, COVID-19 symptoms and testing status upon their arrival at the sleep lab.</li> <li>General precautions to avoid crowding of patients in the waiting room.</li> <li>General protective measures for patients and staff according to national guidelines.</li> <li>Age and comorbidities are taken into account in Spain, Italy and USA for diagnostic study scheduling.</li> <li>Disposable equipment is recommended if available in most countries.</li> </ul> <p><b>Differences</b></p> <ul style="list-style-type: none"> <li>In most countries, home sleep testing is preferred over in-laboratory testing, to minimise risks. On the other hand, the opposite applies to Germany. Furthermore, UK and Italy use apart from cardiorespiratory polygraphy, limited sleep test methodology.</li> <li>U.S.A. has an additional option of using of pickup/return of equipment instead of a delivery service model and removal from service at least 72 hours before re-use.</li> <li>The use of nasal cannulas is not recommended in Italy.</li> <li>Patients and personal staff are screened by swab based on COVID-19 epidemiological status (community spread of COVID-19) and availability of the test.</li> <li>General precautions to avoid crowding of patients in the waiting room are stricter in UK and USA, based on available sleep lab facilities minimising face to face contact and sufficient air exchanges.</li> <li>In case of countries with high community spread of COVID-19, sleep labs are closed for visits.</li> </ul> |                                                                                                                                          |                                                                                                                                          |                                                                                                                                          |                                                                                                                                          |                                                                                                                                          |
