# Supplementary material for: Sleep laboratories reopening and COVID-19: a European perspective
Source: PubMed Central journal article supplement — Eur Respir J. 2021 Mar 4;57(3):2002722. doi: 10.1183/13993003.02722-2020 (PMC7683791; doi:10.1183/13993003.02722-2020), 2021-03-04
Supplement: ERJ-02722-2020.Table_E3.pdf [file ERJ-02722-2020.Table_E3.pdf]

**Table E3. Treating patients at the Sleep Lab during COVID-19 pandemic**

| Spain (5)                                                                                                                                                                                                                                                                                                                                                                                                                                                            | UK (8)                                                                                                                                                                                                                                                                                                                                                                                                                                                                                                                                                                                              | Germany (7)                                                                                                                                                                                                                        | Italy (6)                                                                                                                                                                                                                                                                                                                                                                                                                                                                                                                | USA (AASM, APCCSDD-ATS) (2, 3)                                                                                                                                                                                                                                                                                                                                                                                | Canada (4)                                                                                                                                                                                                                                                                                                                                                                        |
|----------------------------------------------------------------------------------------------------------------------------------------------------------------------------------------------------------------------------------------------------------------------------------------------------------------------------------------------------------------------------------------------------------------------------------------------------------------------|-----------------------------------------------------------------------------------------------------------------------------------------------------------------------------------------------------------------------------------------------------------------------------------------------------------------------------------------------------------------------------------------------------------------------------------------------------------------------------------------------------------------------------------------------------------------------------------------------------|------------------------------------------------------------------------------------------------------------------------------------------------------------------------------------------------------------------------------------|--------------------------------------------------------------------------------------------------------------------------------------------------------------------------------------------------------------------------------------------------------------------------------------------------------------------------------------------------------------------------------------------------------------------------------------------------------------------------------------------------------------------------|---------------------------------------------------------------------------------------------------------------------------------------------------------------------------------------------------------------------------------------------------------------------------------------------------------------------------------------------------------------------------------------------------------------|-----------------------------------------------------------------------------------------------------------------------------------------------------------------------------------------------------------------------------------------------------------------------------------------------------------------------------------------------------------------------------------|
| <p><b>In-laboratory PAP treatment initiation</b></p> <ul style="list-style-type: none"> <li>• Not preferred.</li> <li>• New PAP prescriptions limited or delayed, restricted to urgent cases.</li> <li>• Formula, tele-titration or automatic titration devices.</li> </ul>                                                                                                                                                                                          | <p><b>In-laboratory PAP treatment initiation</b></p> <ul style="list-style-type: none"> <li>• Not preferred.</li> <li>• New PAP prescriptions initially limited or delayed, restricted to urgent cases. Services now catching up to deal with waiting list caused by Covid-19.</li> <li>• <b>Consider outpatient set-up using PPE and telemonitoring titration or autotitrating device.</b></li> <li>• <b>Or outpatient set-up and mask fit to patient as outpatient without turning on equipment, and subsequent video consult support at home on initiation, then telemonitoring .</b></li> </ul> | <p><b>In-laboratory PAP treatment initiation</b></p> <ul style="list-style-type: none"> <li>• Preferred.</li> </ul>                                                                                                                | <p><b>In-laboratory PAP treatment initiation</b></p> <ul style="list-style-type: none"> <li>• Postponed in the acute pandemic and very early re-opening phase</li> <li>• Performed in the re-opening phase with a restrictive local protocol (unless it is performed in a negative pressure room).</li> <li>• Humidifier not used</li> <li>• Equipment disinfected according to the manufacturer's instructions.</li> <li>• Use of a non-leak full face mask with a filter added proximal to exhalation port.</li> </ul> | <p><b>In-laboratory PAP treatment initiation</b></p> <ul style="list-style-type: none"> <li>• Not preferred.</li> <li>• New PAP prescriptions limited or delayed, restricted to urgent cases (exception in an airborne infection isolation room).</li> <li>• Use of non-vented masks with a disposable expiratory port (DEP) and attached HEPA filter may further reduce the risk of if available.</li> </ul> | <p><b>In-laboratory PAP treatment initiation</b></p> <ul style="list-style-type: none"> <li>• Not preferred.</li> <li>• New PAP prescriptions limited or delayed, restricted to urgent cases.</li> <li>• Option is the sale of new machines/masks (e.g. auto-titrating devices, remote titration), preferably sent by mail or courier rather than picked up in person.</li> </ul> |
| <p><b>Home PAP treatment initiation</b></p> <ul style="list-style-type: none"> <li>• Use formula, tele-titration or automatic titration devices).</li> <li>• Humidifier not recommended.</li> <li>• Disposable equipment recommended if available.</li> <li>• Equipment disinfected according to the manufacturer's instructions.</li> <li>• +/-Negative PCR 48h before the study<br/>Use of a non-leaky full facemask with a filter added to the tubing.</li> </ul> | <p><b>Home PAP treatment initiation</b></p> <ul style="list-style-type: none"> <li>• Use of telemonitoring (ambulatory PAP titration without telemonitoring rarely).</li> <li>• Humidifier not recommended (can be used at home).</li> <li>• Disposable equipment is recommended if available.</li> <li>• Equipment disinfected according to the manufacturer's instructions.</li> <li>• Use of a non-leak full face mask with a filter added proximal to exhalation port.</li> </ul>                                                                                                               | <p><b>Home PAP treatment initiation</b></p> <ul style="list-style-type: none"> <li>• Not preferred.</li> <li>• Humidifier not forbidden.</li> <li>• Equipment disinfected according to the manufacturer's instructions.</li> </ul> | <p><b>Home PAP treatment initiation</b></p> <ul style="list-style-type: none"> <li>• Conventional automatic titration with telemonitoring.</li> <li>• Humidifier not used.</li> <li>• Equipment disinfected according to the manufacturer's instructions.</li> <li>• Use of a non-leak full face mask with a filter added proximal to exhalation port.</li> </ul>                                                                                                                                                        | <p><b>Home PAP treatment initiation</b></p> <ul style="list-style-type: none"> <li>• Use of telemonitoring.</li> <li>• Disposable equipment. recommended if available.</li> <li>• Equipment disinfected according to the manufacturer's instructions.</li> <li>• +/-Negative PCR 48h before the study.</li> </ul>                                                                                             | <p><b>Home PAP treatment initiation</b></p> <ul style="list-style-type: none"> <li>• Preferred.</li> </ul>                                                                                                                                                                                                                                                                        |

|                                                                                                                                                                                                                                                     |                                                                                                                                                                                |                                                                                                                                                                                |                                                                                                                                                                                |                                                                                                                                                                                                                                                    |                                                                                                                                                                                |
|-----------------------------------------------------------------------------------------------------------------------------------------------------------------------------------------------------------------------------------------------------|--------------------------------------------------------------------------------------------------------------------------------------------------------------------------------|--------------------------------------------------------------------------------------------------------------------------------------------------------------------------------|--------------------------------------------------------------------------------------------------------------------------------------------------------------------------------|----------------------------------------------------------------------------------------------------------------------------------------------------------------------------------------------------------------------------------------------------|--------------------------------------------------------------------------------------------------------------------------------------------------------------------------------|
| <b>Healthcare professional safety</b> <ul style="list-style-type: none"> <li>General protective measures for health professionals according to national guidelines.</li> </ul>                                                                      | <b>Healthcare professional safety</b> <ul style="list-style-type: none"> <li>General protective measures for health professionals according to national guidelines.</li> </ul> | <b>Healthcare professional safety</b> <ul style="list-style-type: none"> <li>General protective measures for health professionals according to national guidelines.</li> </ul> | <b>Healthcare professional safety</b> <ul style="list-style-type: none"> <li>General protective measures for health professionals according to national guidelines.</li> </ul> | <b>Healthcare professional safety</b> <ul style="list-style-type: none"> <li>General protective measures for health professionals according to national guidelines.</li> </ul>                                                                     | <b>Healthcare professional safety</b> <ul style="list-style-type: none"> <li>General protective measures for health professionals according to national guidelines.</li> </ul> |
| <b>Follow up</b> <ul style="list-style-type: none"> <li>Telemedicine preferred.</li> <li>In case of in-person visit, previous cleaning of the equipment according to manufacturer recommendations, +/-negative PCR 48h before the visit.</li> </ul> | <b>Follow up</b> <ul style="list-style-type: none"> <li>Telemedicine preferred.</li> </ul>                                                                                     | <b>Follow up</b> <ul style="list-style-type: none"> <li>In-lab follow up preferred.</li> </ul>                                                                                 | <b>Follow up</b> <ul style="list-style-type: none"> <li>Telemedicine preferred.</li> </ul>                                                                                     | <b>Follow up</b> <ul style="list-style-type: none"> <li>Telemedicine preferred</li> <li>In case of in-person visit, previous cleaning of the equipment according to manufacturer recommendations, +/-negative PCR 48h before the visit.</li> </ul> | <b>Follow up</b> <ul style="list-style-type: none"> <li>Telemedicine preferred.</li> </ul>                                                                                     |

### Similarities

- General protective measures for patients and staff, according to national guidelines.
- New PAP prescriptions should be limited or delayed and restricted to urgent cases, apart from Germany. In U.S.A. there is an exception if it takes place in an airborne infection isolation room.
- Home PAP treatment initiation using telemonitoring is preferred in many countries.
- Humidifiers are usually not recommended.
- Use of a non-leaky full facemask with a filter added to the tubing in many countries if available.
- Equipment disinfected according to the manufacturer's instructions.
- Follow up with telemedicine is preferred in most countries, except Germany.

### Differences

- In Spain and U.S.A., empirical treatment with delayed diagnostic testing could be considered in high risk cases.
- +/-Negative PCR 48h before the study in Spain and U.S.A, negative PCR in Germany before access to hospitals.
- In case of countries with high community spread of COVID-19, such as Italy, sleep labs are still closed for visits or in the early opening phase. On the other hand, in Germany fewer restrictions, with in lab titrations and in-person visits.
- In U.S.A. and Italy (urgent cases) in lab titrations are permitted if they take place in an airborne infection isolation room.

In U.S.A. and Italy (urgent cases) in lab titrations are permitted if they take place in an airborne infection isolation room.
